# Supplementary material
Source: ML conference proceedings conference paper supplement (https://proceedings.neurips.cc/paper_files/paper/2020/hash/08fb104b0f2f838f3ce2d2b3741a12c2-Abstract.html)
Supplement: Supplementary file [file 08fb104b0f2f838f3ce2d2b3741a12c2-Supplemental.pdf]

## A Differential Privacy and Generalization Analysis

### A.1 Proof of Lemma 1

By applying Theorem 8 from [11] to gradient computation, we obtain Lemma 1.

**Lemma 1.** *Let  $\mathcal{A}$  be an  $(\epsilon, \delta)$ -differentially private gradient descent algorithm with access to training set  $S$  of size  $n$ . Let  $\mathbf{w}_t = \mathcal{A}(S)$  be the parameter generated at iteration  $t \in [T]$  and  $\hat{\mathbf{g}}_t$  the empirical gradient on  $S$ . For any  $\sigma > 0$ ,  $\beta > 0$ , if the privacy cost of  $\mathcal{A}$  satisfies  $\epsilon \leq \sigma/13$ ,  $\delta \leq \sigma\beta/(26 \ln(26/\sigma))$ , and sample size  $n \geq 2 \ln(8/\delta)/\epsilon^2$ , we then have*

$$\mathbb{P} \left\{ |\hat{\mathbf{g}}_t^i - \mathbf{g}_t^i| \geq G\sigma \right\} \leq \beta, \quad \forall i \in [d] \text{ and } \forall t \in [T].$$

**Proof** Theorem 8 in [11] shows that in order to achieve generalization error  $\tau$  with probability  $1 - \rho$  for an  $(\epsilon, \delta)$ -differentially private algorithm (i.e., in order to guarantee for every function  $\phi_t$ ,  $\forall t \in [T]$ , we have  $\mathbb{P}[\mathcal{P}[\phi_t] - \mathcal{E}_S[\phi_t] \geq \tau] \leq \rho$ ), where  $\mathcal{P}[\phi_t]$  is the population value,  $\mathcal{E}_S[\phi_t]$  is the empirical value evaluated on  $S$  and  $\rho$  and  $\tau$  are any positive constant, we can set the  $\epsilon \leq \frac{\tau}{13}$  and  $\delta \leq \frac{\tau\rho}{26 \ln(26/\tau)}$ . In our context,  $\tau = \sigma$ ,  $\beta = \rho$ ,  $\phi_t$  is the gradient computation function  $\nabla \ell(\mathbf{w}_t, \mathbf{z})$ ,  $\mathcal{P}[\phi_t]$  represents the population gradient  $\mathbf{g}_t^i/G$ ,  $\forall i \in [p]$ , and  $\mathcal{E}_S[\phi_t]$  represents the sample gradient  $\hat{\mathbf{g}}_t^i/G$ ,  $\forall i \in [p]$ . Thus we have  $\mathbb{P} \left\{ |\hat{\mathbf{g}}_t^i - \mathbf{g}_t^i|/G \geq \tau \right\} \leq \rho$  if  $\epsilon \leq \frac{\sigma}{13}$ ,  $\delta \leq \frac{\sigma\beta}{26 \ln(26/\sigma)}$ .

### A.2 Proof of Lemma 2

**Lemma 2.** *SAGD with DPG-LAP (Alg. 1) is  $(\frac{\sqrt{T \ln(1/\delta)} G_1}{n\sigma}, \delta)$ -differentially private.*

**Proof** At each iteration  $t$ , the algorithm is composed of two sequential parts: DPG to access the training set  $S$  and compute  $\tilde{\mathbf{g}}_t$ , and parameter update based on estimated  $\tilde{\mathbf{g}}_t$ . We mark the DPG as part  $\mathcal{A}$  and the gradient descent as part  $\mathcal{B}$ . We first show  $\mathcal{A}$  preserves  $\frac{G_1}{n\sigma}$ -differential privacy. Then according to the *post-processing property* of differential privacy (Proposition 2.1 in [14]) we have  $\mathcal{B} \circ \mathcal{A}$  is also  $\frac{G_1}{n\sigma}$ -differentially private.

The part  $\mathcal{A}$  (DPG-Lap) uses the basic tool from differential privacy, the ‘‘Laplace Mechanism’’ (Definition 3.3 in [14]). The Laplace Mechanism adds i.i.d. Laplace noise to each coordinate of the output. Adding noise from  $Lap(\sigma)$  to a query of  $G_1/n$  sensitivity preserves  $G_1/n\sigma$ -differential privacy by (Theorem 3.6 in [14]). Over  $T$  iterations, we have  $T$  applications of a DPG-Lap. By the advanced composition theorem (Theorem 3.20 in [14]),  $T$  applications of a  $\frac{G_1}{n\sigma}$ -differentially private algorithm is  $(\frac{\sqrt{T \ln(1/\delta)} G_1}{n\sigma}, \delta)$ -differentially private. So SAGD with DPG-Lap is  $(\frac{\sqrt{T \ln(1/\delta)} 2G_1}{n\sigma}, \delta)$ -differentially private.  $\square$

### A.3 Proof of Theorem 1

**Theorem 1** *Given  $\sigma > 0$ , let  $\tilde{\mathbf{g}}_1, \dots, \tilde{\mathbf{g}}_T$  be gradients computed by DPG-LAP in SAGD. Set the number of iterations  $2n\sigma^2/G_1^2 \leq T \leq n^2\sigma^4/(169 \ln(1/(\sigma\beta))G_1^2)$ , then for  $t \in [T]$ ,  $\beta > 0$ ,  $\mu > 0$ :*

$$\mathbb{P} \left\{ \|\tilde{\mathbf{g}}_t - \mathbf{g}_t\| \geq \sqrt{d}\sigma(G + \mu) \right\} \leq d\beta + d \exp(-\mu).$$

**Proof** The concentration bound is decomposed into two parts:

$$\mathbb{P} \left\{ \|\tilde{\mathbf{g}}_t - \mathbf{g}_t\| \geq \sqrt{d}\sigma(G + \mu) \right\} \leq \underbrace{\mathbb{P} \left\{ \|\tilde{\mathbf{g}}_t - \hat{\mathbf{g}}_t\| \geq \sqrt{d}\sigma\mu \right\}}_{T_1: \text{empirical error}} + \underbrace{\mathbb{P} \left\{ \|\hat{\mathbf{g}}_t - \mathbf{g}_t\| \geq \sqrt{d}\sigma \right\}}_{T_2: \text{generalization error}}.$$

In the above inequality, there are two types of errors which we need to control. The first type of error, referred to as empirical error  $T_1$ , is the deviation between the differentially private estimated gradient  $\tilde{\mathbf{g}}_t$  and the empirical gradient  $\hat{\mathbf{g}}_t$ . The second type of error, referred to as generalization error  $T_2$ , is the deviation between the empirical gradient  $\hat{\mathbf{g}}_t$  and the population gradient  $\mathbf{g}_t$ .

The second term  $T_2$  can be bounded through the generalization guarantee of differential privacy. Recall that from Lemma 1, under the condition in Theorem 3, we have for all  $t \in [T], i \in [d]$ :

$$\mathbb{P} \{ |\hat{\mathbf{g}}_t^i - \mathbf{g}_t^i| \geq G\sigma \} \leq \beta.$$

So that we have

$$\mathbb{P} \left\{ \|\hat{\mathbf{g}}_t - \mathbf{g}_t\| \geq \sqrt{d}G\sigma \right\} \leq \mathbb{P} \{ \|\hat{\mathbf{g}}_t - \mathbf{g}_t\|_\infty \geq G\sigma \} \leq d\mathbb{P} \{ |\hat{\mathbf{g}}_t^i - \mathbf{g}_t^i| \geq G\sigma \} \leq d\beta. \quad (3)$$

Now we bound the second term  $T_1$ . Recall that  $\tilde{\mathbf{g}}_t = \hat{\mathbf{g}}_t + \mathbf{b}_t$ , where  $\mathbf{b}_t$  is a noise vector with each coordinate drawn from Laplace noise  $\text{Lap}(\sigma)$ . In this case, we have

$$\mathbb{P} \left\{ \|\tilde{\mathbf{g}}_t - \hat{\mathbf{g}}_t\| \geq \sqrt{d}\sigma\mu \right\} \leq \mathbb{P} \left\{ \|\mathbf{b}_t\| \geq \sqrt{d}\sigma\mu \right\} \leq \mathbb{P} \{ \|\mathbf{b}_t\|_\infty \geq \sigma\mu \} \leq d\mathbb{P} \{ |\mathbf{b}_t^i| \geq \sigma\mu \} = d\exp(-\mu). \quad (4)$$

The second inequality comes from  $\|\mathbf{b}_t\| \leq \sqrt{d}\|\mathbf{b}_t\|_\infty$ . The last equality comes from the property of Laplace distribution. Combine (3) and (4), we complete the proof.  $\square$

#### A.4 Proof of Lemma 3

**Lemma 3.** SAGD with DPG-SPARSE (Alg. 2) is  $(\frac{\sqrt{C_s \ln(2/\delta)2G_1}}{n\sigma}, \delta)$ -differentially private.

**Proof** At each iteration  $t$ , the algorithm is composed of two sequential parts: DPG-Sparse (part  $\mathcal{A}$ ) and parameter update based on estimated  $\tilde{\mathbf{g}}_t$  (part  $\mathcal{B}$ ). We first show  $\mathcal{A}$  preserves  $\frac{2G_1}{n\sigma}$ -differential privacy. Then according to the *post-processing property* of differential privacy (Proposition 2.1 in [14]) we have  $\mathcal{B} \circ \mathcal{A}$  is also  $\frac{2G_1}{n\sigma}$ -differentially private.

The part  $\mathcal{A}$  (DPG-Sparse) is a composition of basic tools from differential privacy, the ‘‘Sparse Vector Algorithm’’ (Algorithm 2 in [14]) and the ‘‘Laplace Mechanism’’ (Definition 3.3 in [14]). In our setting, the sparse vector algorithm takes as input a sequence of  $T$  sensitivity  $G_1/n$  queries, and for each query, attempts to determine whether the value of the query, evaluated on the private dataset  $S_1$ , is above a fixed threshold  $\gamma + \tau$  or below it. In our instantiation, the  $S_1$  is the private data set, and each function corresponds to the gradient computation function  $\hat{\mathbf{g}}_t$  which is of sensitivity  $G_1/n$ . By the privacy guarantee of the sparse vector algorithm, the sparse vector portion of SAGD satisfies  $G_1/n\sigma$ -differential privacy. The Laplace mechanism portion of SAGD satisfies  $G_1/n\sigma$ -differential privacy by (Theorem 3.6 in [14]). Finally, the composition of two mechanisms satisfies  $\frac{2G_1}{n\sigma}$ -differential privacy. For the sparse vector technique, only the query that fails the validation, corresponding to the ‘above threshold’, release the privacy of private dataset  $S_1$  and pays a  $\frac{2G_1}{n\sigma}$  privacy cost. Over all the iterations  $T$ , We have  $C_s$  queries fail the validation. Thus, by the advanced composition theorem (Theorem 3.20 in [14]),  $C_s$  applications of a  $\frac{2G_1}{n\sigma}$ -differentially private algorithm is  $(\frac{\sqrt{C_s \ln(2/\delta)2G_1}}{n\sigma}, \delta)$ -differentially private. Therefore, SAGD with DPG-Sparse is  $(\frac{\sqrt{C_s \ln(2/\delta)2G_1}}{n\sigma}, \delta)$ -differentially private.  $\square$

#### A.5 Proof of Theorem 3:

**Theorem 3** Given  $\sigma > 0$ , let  $\tilde{\mathbf{g}}_1, \dots, \tilde{\mathbf{g}}_T$  be the gradients computed by DPG-SPARSE in SAGD. With a budget  $n\sigma^2/(2G_1^2) \leq C_s \leq n^2\sigma^4/(676 \ln(1/(\sigma\beta))G_1^2)$ , then for  $t \in [T], \beta > 0, \mu > 0$ :

$$\mathbb{P} \left\{ \|\tilde{\mathbf{g}}_t - \mathbf{g}_t\| \geq \sqrt{d}\sigma(1 + \mu) \right\} \leq d\beta + d\exp(-\mu).$$

**Proof** The concentration bound can be decomposed into two parts:

$$\mathbb{P} \left\{ \|\tilde{\mathbf{g}}_t - \mathbf{g}_t\| \geq \sqrt{d}\sigma(1 + \mu) \right\} \leq \underbrace{\mathbb{P} \left\{ \|\tilde{\mathbf{g}}_t - \hat{\mathbf{g}}_{s_1,t}\| \geq \sqrt{d}\sigma\mu \right\}}_{T_1: \text{empirical error}} + \underbrace{\mathbb{P} \left\{ \|\hat{\mathbf{g}}_{s_1,t} - \mathbf{g}_t\| \geq \sqrt{d}\sigma \right\}}_{T_2: \text{generalization error}},$$

which yields

$$\mathbb{P} \left\{ \|\hat{\mathbf{g}}_{s_1,t} - \mathbf{g}_t\| \geq \sqrt{d}\sigma \right\} \leq \mathbb{P} \left\{ \|\hat{\mathbf{g}}_{s_1,t} - \mathbf{g}_t\|_\infty \geq \sigma \right\} \leq d\mathbb{P} \left\{ |\hat{g}_{s_1,t}^i - g_t^i| \geq \sigma \right\} \leq d\beta. \quad (5)$$

Now we bound the second term  $T_1$  by considering two cases, by depending on whether DPG-3 answers the query  $\tilde{\mathbf{g}}_t$  by returning  $\tilde{\mathbf{g}}_t = \hat{\mathbf{g}}_{s_1,t} + \mathbf{v}_t$  or by returning  $\tilde{\mathbf{g}}_t = \hat{\mathbf{g}}_{s_2,t}$ . In the first case, we have

$$\|\tilde{\mathbf{g}}_t - \hat{\mathbf{g}}_{s_1,t}\| = \|\mathbf{v}_t\|$$

and

$$\mathbb{P} \left\{ \|\tilde{\mathbf{g}}_t - \hat{\mathbf{g}}_{s_1,t}\| \geq \sqrt{d}\sigma\mu \right\} = \mathbb{P} \left\{ \|\mathbf{v}_t\| \geq \sqrt{d}\sigma\mu \right\} \leq d \exp(-\mu).$$

The last inequality comes from the  $\|\mathbf{v}_t\| \leq \sqrt{d}\|\mathbf{v}_t\|_\infty$  and properties of the Laplace distribution.

In the second case, we have

$$\|\tilde{\mathbf{g}}_t - \hat{\mathbf{g}}_{s_1,t}\| = \|\hat{\mathbf{g}}_{s_2,t} - \hat{\mathbf{g}}_{s_1,t}\| \leq |\gamma| + |\tau|$$

and

$$\begin{aligned} \mathbb{P} \left\{ \|\tilde{\mathbf{g}}_t - \hat{\mathbf{g}}_{s_1,t}\| \geq \sqrt{d}\sigma\mu \right\} &= \mathbb{P} \left\{ |\gamma| + |\tau| \geq \sqrt{d}\sigma\mu \right\} \\ &\leq \mathbb{P} \left\{ |\gamma| \geq \frac{2}{6}\sqrt{d}\sigma\mu \right\} + \mathbb{P} \left\{ |\tau| \geq \frac{4}{6}\sqrt{d}\sigma\mu \right\} \\ &= 2 \exp(-\sqrt{d}\mu/6). \end{aligned}$$

Combining these two cases, we have

$$\begin{aligned} \mathbb{P} \left\{ \|\tilde{\mathbf{g}}_t - \hat{\mathbf{g}}_{s_1,t}\| \geq \sqrt{d}\sigma\mu \right\} &\leq \max \left\{ \mathbb{P} \left\{ \|\mathbf{v}_t\| \geq \sqrt{d}\sigma\mu \right\}, \mathbb{P} \left\{ |\gamma| + |\tau| \geq \sqrt{d}\sigma\mu \right\} \right\} \\ &\leq \max \left\{ d \exp(-\mu), 2 \exp(-\sqrt{d}\mu/6) \right\} \\ &= d \exp(-\mu). \end{aligned} \quad (6)$$

We complete the proof by combining (5) and (6). □

## B Non-asymptotic Convergence analysis

In this section, we present the proofs for Theorems 2, 4, 5.

### B.1 Proof of Theorem 2 and Theorem 4

The proof of Theorem 2 consists of two parts: We first prove that the convergence rate of a gradient-based iterative algorithm is related to the gradient concentration error  $\alpha$  and its iteration time  $T$ . Then we combine the concentration error  $\alpha$  achieved by SAGD with DPG-Lap in Theorem 1 with the first part to complete the proof of Theorem 2. To simplify the analysis, we first use  $\alpha$  and  $\xi$  to denote the generalization error  $\sqrt{d}\sigma(G + \mu)$  and probability  $d\beta + d \exp(-\mu)$  in Theorem 1 in the following analysis. The details are presented in the following theorem.

**Theorem 6** *Let  $\tilde{\mathbf{g}}_1, \dots, \tilde{\mathbf{g}}_T$  be the noisy gradients generated in Algorithm 1 through DPG oracle over  $T$  iterations. Then, for every  $t \in [T]$ ,  $\tilde{\mathbf{g}}_t$  satisfies*

$$\mathbb{P} \left\{ \|\tilde{\mathbf{g}}_t - \mathbf{g}_t\| \geq \alpha \right\} \leq \xi,$$

*where the values of  $\alpha$  and  $\xi$  are given in Section A.*

With the guarantee of Theorem 6, we have the next theorem which shows the convergence of SAGD.

**Theorem 7** Let  $\eta_t = \eta$ . Further more assume that  $\nu$ ,  $\beta$  and  $\eta$  are chosen such that the following conditions satisfied:  $\eta \leq \frac{\nu}{2L}$ . Under the Assumption A1 and A2, the Algorithm 1 with  $T$  iterations,  $\phi_t(\tilde{\mathbf{g}}_1, \dots, \tilde{\mathbf{g}}_t) = \tilde{\mathbf{g}}_t$  and  $\mathbf{v}_t = (1 - \beta_2) \sum_{i=1}^t \beta_2^{t-i} \tilde{\mathbf{g}}_i^2$  achieves:

$$\min_{t=1, \dots, T} \|\nabla f(x_t)\|^2 \leq (G + \nu) \times \left( \frac{f(\mathbf{w}_1) - f^*}{\eta T} + \frac{3\alpha^2}{4\nu} \right), \quad (7)$$

with probability at least  $1 - T\xi$ .

We can now tackle the proof of our result stated in Theorem 7.

**Proof** Using the update rule of RMSprop, we have  $\phi_t(\tilde{\mathbf{g}}_1, \dots, \tilde{\mathbf{g}}_t) = \tilde{\mathbf{g}}_t$  and  $\psi_t(\tilde{\mathbf{g}}_1, \dots, \tilde{\mathbf{g}}_t) = (1 - \beta_2) \sum_{i=1}^t \beta_2^{t-i} \tilde{\mathbf{g}}_i^2$ . Thus, we can rewrite the update of Algorithm 1 as:

$$\mathbf{w}_{t+1} = \mathbf{w}_t - \eta_t \tilde{\mathbf{g}}_t / (\sqrt{\mathbf{v}_t} + \nu) \text{ and } \mathbf{v}_t = (1 - \beta_2) \sum_{i=1}^t \beta_2^{t-i} \tilde{\mathbf{g}}_i^2.$$

Let  $\Delta_t = \tilde{\mathbf{g}}_t - g_t$ , we obtain:

$$\begin{aligned} & f(\mathbf{w}_{t+1}) \\ & \leq f(\mathbf{w}_t) + \langle \mathbf{g}_t, \mathbf{w}_{t+1} - \mathbf{w}_t \rangle + \frac{L}{2} \|\mathbf{w}_{t+1} - \mathbf{w}_t\|^2 \\ & = f(\mathbf{w}_t) - \eta_t \langle \mathbf{g}_t, \tilde{\mathbf{g}}_t / (\sqrt{\mathbf{v}_t} + \nu) \rangle + \frac{L\eta_t^2}{2} \left\| \frac{\tilde{\mathbf{g}}_t}{(\sqrt{\mathbf{v}_t} + \nu)} \right\|^2 \\ & = f(\mathbf{w}_t) - \eta_t \left\langle \mathbf{g}_t, \frac{\mathbf{g}_t + \Delta_t}{\sqrt{\mathbf{v}_t} + \nu} \right\rangle + \frac{L\eta_t^2}{2} \left\| \frac{\mathbf{g}_t + \Delta_t}{\sqrt{\mathbf{v}_t} + \nu} \right\|^2 \\ & \leq f(\mathbf{w}_t) - \eta_t \left\langle \mathbf{g}_t, \frac{\mathbf{g}_t}{\sqrt{\mathbf{v}_t} + \nu} \right\rangle - \eta_t \left\langle \mathbf{g}_t, \frac{\Delta_t}{\sqrt{\mathbf{v}_t} + \nu} \right\rangle + L\eta_t^2 \left( \left\| \frac{\mathbf{g}_t}{\sqrt{\mathbf{v}_t} + \nu} \right\|^2 + \left\| \frac{\Delta_t}{\sqrt{\mathbf{v}_t} + \nu} \right\|^2 \right) \\ & = f(\mathbf{w}_t) - \eta_t \sum_{i=1}^d \frac{[\mathbf{g}_t]_i^2}{\sqrt{\mathbf{v}_t^i} + \nu} - \eta_t \sum_{i=1}^d \frac{\mathbf{g}_t^i \Delta_t^i}{\sqrt{\mathbf{v}_t^i} + \nu} + L\eta_t^2 \left( \sum_{i=1}^d \frac{[\mathbf{g}_t]_i^2}{(\sqrt{\mathbf{v}_t^i} + \nu)^2} + \sum_{i=1}^d \frac{[\Delta_t]_i^2}{(\sqrt{\mathbf{v}_t^i} + \nu)^2} \right) \\ & \leq f(\mathbf{w}_t) - \eta_t \sum_{i=1}^d \frac{[\mathbf{g}_t]_i^2}{\sqrt{\mathbf{v}_t^i} + \nu} + \frac{\eta_t}{2} \sum_{i=1}^d \frac{[\mathbf{g}_t]_i^2 + [\Delta_t]_i^2}{\sqrt{\mathbf{v}_t^i} + \nu} + \frac{L\eta_t^2}{\nu} \left( \sum_{i=1}^d \frac{[\mathbf{g}_t]_i^2}{\sqrt{\mathbf{v}_t^i} + \nu} + \sum_{i=1}^d \frac{[\Delta_t]_i^2}{\sqrt{\mathbf{v}_t^i} + \nu} \right) \\ & = f(\mathbf{w}_t) - \left( \eta_t - \frac{\eta_t}{2} - \frac{L\eta_t^2}{\nu} \right) \sum_{i=1}^d \frac{[\mathbf{g}_t]_i^2}{\sqrt{\mathbf{v}_t^i} + \nu} + \left( \frac{\eta_t}{2} + \frac{L\eta_t^2}{\nu} \right) \sum_{i=1}^d \frac{[\Delta_t]_i^2}{\sqrt{\mathbf{v}_t^i} + \nu}. \end{aligned}$$

Given the parameter setting from the theorem, we see the following condition hold:

$$\frac{L\eta_t}{\nu} \leq \frac{1}{4}.$$

Then we obtain

$$\begin{aligned} f(\mathbf{w}_{t+1}) & \leq f(\mathbf{w}_t) - \frac{\eta}{4} \sum_{i=1}^d \frac{[\mathbf{g}_t]_i^2}{\sqrt{\mathbf{v}_t^i} + \nu} + \frac{3\eta}{4} \sum_{i=1}^d \frac{[\Delta_t]_i^2}{\sqrt{\mathbf{v}_t^i} + \nu} \\ & \leq f(\mathbf{w}_t) - \frac{\eta}{G + \nu} \|\mathbf{g}_t\|^2 + \frac{3\eta}{4\epsilon} \|\Delta_t\|^2. \end{aligned}$$

The second inequality follows from the fact that  $0 \leq \mathbf{v}_t^i \leq G^2$ . Using the telescoping sum and rearranging the inequality, we obtain

$$\frac{\eta}{G + \nu} \sum_{t=1}^T \|\mathbf{g}_t\|^2 \leq f(\mathbf{w}_1) - f^* + \frac{3\eta}{4\epsilon} \sum_{t=1}^T \|\Delta_t\|^2.$$

Multiplying with  $\frac{G+\nu}{\eta T}$  on both sides and with the guarantee in Theorem 1 that  $\|\Delta_t\| \leq \alpha$  with probability at least  $1 - \xi$ , we obtain

$$\min_{t=1,\dots,T} \|\mathbf{g}_t\|^2 \leq (G + \nu) \times \left( \frac{f(\mathbf{w}_1) - f^*}{\eta T} + \frac{3\alpha^2}{4\nu} \right),$$

with probability at least  $1 - T\xi$ .  $\square$

We now present the proof of our Theorem 2.

**Theorem 2** *Given training set  $S$  of size  $n$ , for  $\nu > 0$ , if  $\eta_t = \eta$  with  $\eta \leq \nu/(2L)$ ,  $\sigma = 1/n^{1/3}$ , iteration number  $T = n^{2/3}/(169G_1^2(\ln d + 7\ln n/3))$ ,  $\mu = \ln(1/\beta)$  and  $\beta = 1/(dn^{5/3})$ , then SAGD with DPG-LAP algorithm yields:*

$$\min_{1 \leq t \leq T} \|\nabla f(\mathbf{w}_t)\|^2 \leq \mathcal{O}\left(\frac{\rho_{n,d}(f(\mathbf{w}_1) - f^*)}{n^{2/3}}\right) + \mathcal{O}\left(\frac{d\rho_{n,d}^2}{n^{2/3}}\right),$$

with probability at least  $1 - \mathcal{O}(1/(\rho_{n,d}n))$ .

**Proof** First consider the gradient concentration bound achieved by SAGD (Theorem 1 and Theorem 3) that if  $\frac{2n\sigma^2}{G_1^2} \leq T \leq \frac{n^2\sigma^4}{169\ln(1/(\sigma\beta))G_1^2}$ , we have

$$\mathbb{P}\left\{\|\tilde{\mathbf{g}}_t - \mathbf{g}_t\| \geq \sqrt{d}\sigma(G + \mu)\right\} \leq d\beta + d\exp(-\mu), \quad \forall t \in [T].$$

Then bring the setting in Theorem 2 that  $\sigma = 1/n^{1/3}$ , let  $\mu = \ln(1/\beta)$  and  $\beta = 1/(dn^{5/3})$ , we have

$$\|\tilde{\mathbf{g}}_t - \mathbf{g}_t\|^2 \leq d(1 + \ln d + \frac{5}{3}\ln n)^2/n^{2/3},$$

with probability at least  $1 - 1/n^{5/3}$ , when we set  $T = n^{2/3}/(169G_1^2(\ln d + \frac{7}{3}\ln n))$ .

Connect this result with Theorem 7, so that we have  $\alpha^2 = d(1 + \ln d + \frac{5}{3}\ln n)^2/n^{2/3}$  and  $\xi = 1/n^{5/3}$ . Bring the value  $\alpha^2$ ,  $\xi$  and  $T = n^{2/3}/(169G_1^2(\ln d + \frac{7}{3}\ln n))$  into (7), with  $\rho_{n,d} = \mathcal{O}(\ln n + \ln d)$ , we have

$$\min_{t=1,\dots,T} \|\nabla f(\mathbf{w}_t)\|^2 \leq \mathcal{O}\left(\frac{\rho_{n,d}(f(\mathbf{w}_1) - f^*)}{n^{2/3}}\right) + \mathcal{O}\left(\frac{d\rho_{n,d}^2}{n^{2/3}}\right),$$

with probability at least  $1 - \mathcal{O}\left(\frac{1}{\rho_{n,d}n}\right)$  which concludes the proof.  $\square$

**Theorem 4** *Given training set  $S$  of size  $n$ , for  $\nu > 0$ , if  $\eta_t = \eta$  which are chosen with  $\eta \leq \nu/(2L)$ , noise level  $\sigma = 1/n^{1/3}$ , and iteration number  $T = n^{2/3}/(676G_1^2(\ln d + \frac{7}{3}\ln n))$ , then SAGD with DPG-SPARSE algorithm yields:*

$$\min_{1 \leq t \leq T} \|\nabla f(\mathbf{w}_t)\|^2 \leq \mathcal{O}\left(\frac{\rho_{n,d}(f(\mathbf{w}_1) - f^*)}{n^{2/3}}\right) + \mathcal{O}\left(\frac{d\rho_{n,d}^2}{n^{2/3}}\right),$$

with probability at least  $1 - \mathcal{O}(1/(\rho_{n,d}n))$ .

**Proof** The proof of Theorem 4 follows the proof of Theorem 2 by considering the case  $C_s = T$ .  $\square$

## B.2 Proof of Theorem 5

**Theorem 5** Consider the mini-batch SAGD with DPG-LAP. Given  $S$  of size  $n$ , with  $\nu > 0$ ,  $\eta_t = \eta \leq \nu/(2L)$ , noise level  $\sigma = 1/(mn)^{1/6}$ , and epoch  $T = m^{4/3}/(n^{2/3}169G_1^2(\ln d + \frac{7}{3}\ln n))$ , then:

$$\min_{t=1,\dots,T} \|\nabla f(\mathbf{w}_t)\|^2 \leq \mathcal{O}\left(\frac{\rho_{n,d}(f(\mathbf{w}_1) - f^*)}{(mn)^{1/3}}\right) + \mathcal{O}\left(\frac{d\rho_{n,d}^2}{(mn)^{1/3}}\right),$$

with probability at least  $1 - \mathcal{O}(1/(\rho_{n,d}n))$ .

**Proof** When mini-batch SAGD calls **DPG** to access each batch  $s_k$  with size  $m$  for  $T$  times, we have mini-batch SAGD preserves  $(\frac{\sqrt{T\ln(1/\delta)}G_1}{m\sigma}, \delta)$ -differential privacy for each batch  $s_k$ . Now consider the gradient concentration bound achieved by DPG-Lap (Theorem 1) that if  $\frac{2m\sigma^2}{G_1^2} \leq T \leq \frac{m^2\sigma^4}{169\ln(1/(\sigma\beta))G_1^2}$ , we have

$$\mathbb{P}\left\{\|\tilde{\mathbf{g}}_t - \mathbf{g}_t\| \geq \sqrt{d}\sigma(G + \mu)\right\} \leq d\beta + d\exp(-\mu), \quad \forall t \in [T].$$

Then bring the setting in Theorem 5 that  $\sigma = 1/(nm)^{1/6}$ , let  $\mu = \ln(1/\beta)$  and  $\beta = 1/(dn^{5/3})$ , we have

$$\|\tilde{\mathbf{g}}_t - \mathbf{g}_t\|^2 \leq d(1 + \ln d + \frac{5}{3}\ln n)^2/n^{2/3},$$

with probability at least  $1 - 1/n^{5/3}$ , when we set epoch  $T = m^{4/3}/(n^{2/3}169G_1^2(\ln d + \frac{7}{3}\ln n))$ .

Connect this result with Theorem 7, so that we have  $\alpha^2 = d(1 + \ln d + \frac{5}{3}\ln n)^2/(mn)^{1/3}$  and  $\xi = 1/n^{5/3}$ . Bring the value  $\alpha^2$ ,  $\xi$  and total iteration number to be  $T \times n/m$  with  $T = (mn)^{1/3}/(169G_1^2(\ln d + \frac{7}{3}\ln n))$  into (7), with  $\rho_{n,d} = \mathcal{O}(\ln n + \ln d)$ , we have

$$\min_{t=1,\dots,T} \|\nabla f(\mathbf{w}_t)\|^2 \leq \mathcal{O}\left(\frac{\rho_{n,d}(f(\mathbf{w}_1) - f^*)}{(mn)^{1/3}}\right) + \mathcal{O}\left(\frac{d\rho_{n,d}^2}{(mn)^{1/3}}\right),$$

with probability at least  $1 - \mathcal{O}\left(\frac{1}{\rho_{n,d}n}\right)$ . Here we complete the proof.  $\square$
